# Supplementary material
Source: PubMed Central journal article supplement (PMC4603599)
Supplement: supp_WNL.0000000000001951_Figure_e-1.pdf [file supp_WNL.0000000000001951_Figure_e-1.pdf]

**Figure e-1: Study Participant Selection**

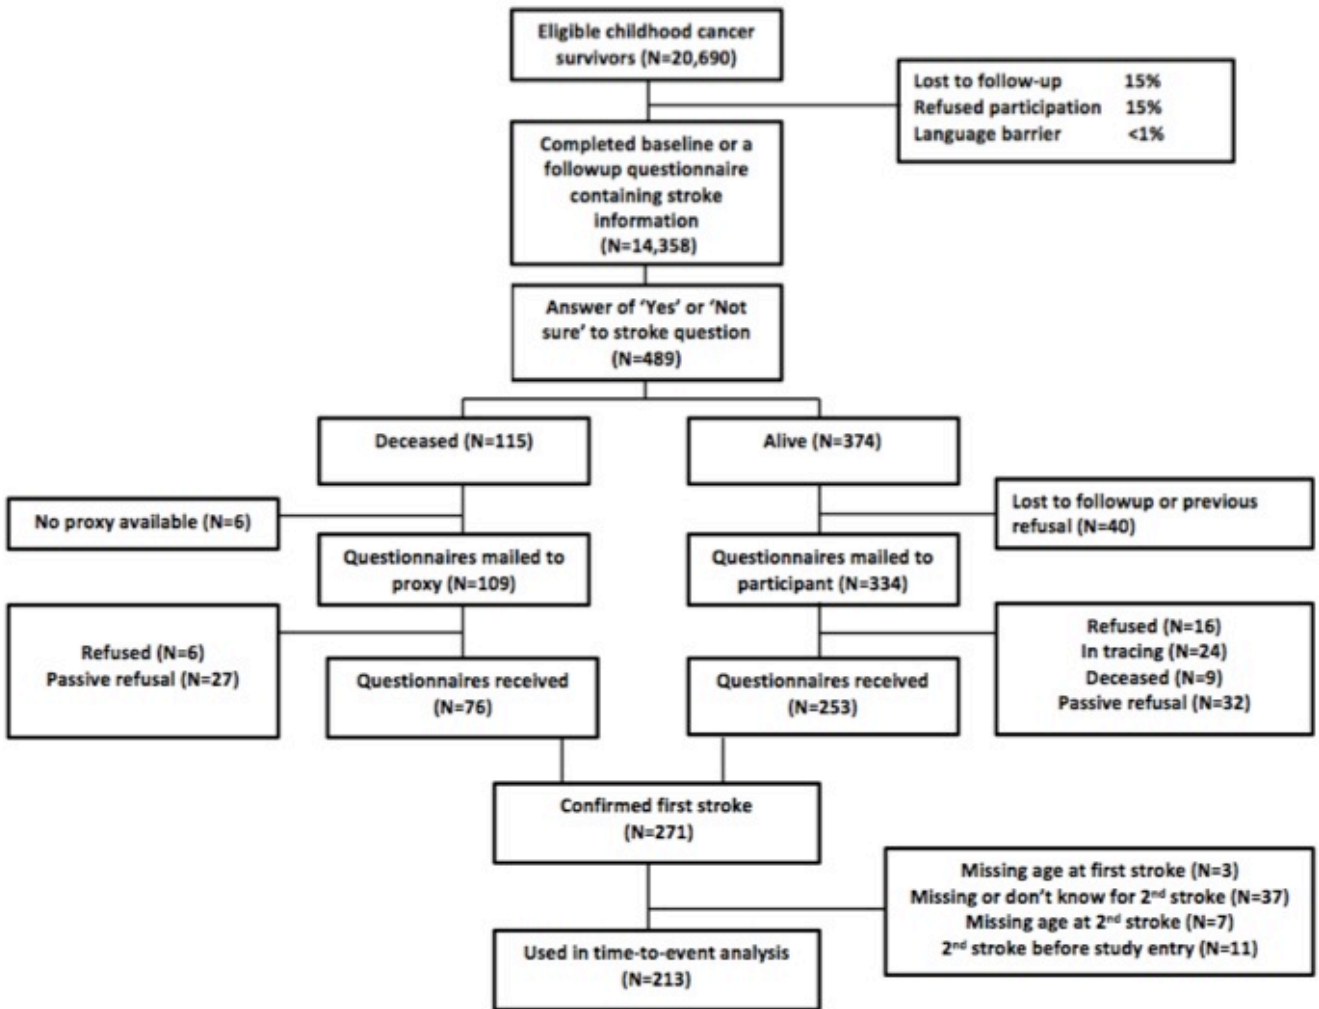

CONSORT flow diagram demonstrating the recruitment and participation of the 443 patients within the Childhood Cancer Survivor Study who were mailed the 2011 Stroke Questionnaire.
