# Supplementary material
Source: PubMed Central journal article supplement (PMC4603599)
Supplement: supp_WNL.0000000000001951_Table_e-1.pdf [file supp_WNL.0000000000001951_Table_e-1.pdf]

**Table e-1: chi-square test**

| Variable                                | Level              | Completed recurrent stroke survey<br>N (%) | Did not complete recurrent stroke survey<br>N (%) | Total      | P-value (based chi-square) |
|-----------------------------------------|--------------------|--------------------------------------------|---------------------------------------------------|------------|----------------------------|
| <b>Total</b>                            |                    | <b>329</b>                                 | <b>160</b>                                        | <b>489</b> |                            |
| Gender                                  | Male               | 173 (53%)                                  | 85 (53%)                                          | 258        | 0.91                       |
|                                         | Female             | 156 (47%)                                  | 75 (47%)                                          | 231        |                            |
| Race                                    | White non-hispanic | 263 (80%)                                  | 132 (83%)                                         | 395        | 0.75                       |
|                                         | Black              | 19 (6%)                                    | 6 (4%)                                            | 25         |                            |
|                                         | Other              | 44 (13%)                                   | 20 (13%)                                          | 64         |                            |
|                                         | Unknown            | 3 (<1%)                                    | 2 (1%)                                            | 5          |                            |
| Age at cancer diagnosis, years          | 0-4                | 116 (35%)                                  | 49 (31%)                                          | 165        | 0.58                       |
|                                         | 5-9                | 76 (23%)                                   | 41 (26%)                                          | 117        |                            |
|                                         | 10-14              | 69 (21%)                                   | 40 (25%)                                          | 109        |                            |
|                                         | 15-20              | 68 (21%)                                   | 30 (19%)                                          | 98         |                            |
| Age at first stroke, years              | 0-17               | 142 (43%)                                  | 69 (43%)                                          | 211        | 0.20                       |
|                                         | 18-29              | 66 (20%)                                   | 28 (18%)                                          | 94         |                            |
|                                         | 30-39              | 70 (21%)                                   | 30 (19%)                                          | 100        |                            |
|                                         | ≥40                | 32 (10%)                                   | 14 (9%)                                           | 46         |                            |
|                                         | Unknown            | 19 (6%)                                    | 19 (12%)                                          | 38         |                            |
| Age at last followup or death, years    | 0-17               | 22 (7%)                                    | 13 (8%)                                           | 35         | 0.48                       |
|                                         | 18-29              | 91 (28%)                                   | 51 (32%)                                          | 142        |                            |
|                                         | 30-39              | 122 (37%)                                  | 60 (38%)                                          | 182        |                            |
|                                         | ≥40                | 94 (29%)                                   | 36 (23%)                                          | 130        |                            |
| Cancer diagnosis                        | Brain tumor        | 140 (43%)                                  | 61 (38%)                                          | 201        | 0.68                       |
|                                         | Leukemia           | 90 (27%)                                   | 51 (32%)                                          | 141        |                            |
|                                         | Hodgkins           | 35 (11%)                                   | 15 (9%)                                           | 50         |                            |
|                                         | Other              | 64 (19%)                                   | 33 (21%)                                          | 97         |                            |
| Cranial radiation therapy maximum dose* | None               | 55 (18%)                                   | 25 (19%)                                          | 80         | 0.15                       |
|                                         | 1-29 Gy            | 55 (18%)                                   | 32 (24%)                                          | 87         |                            |
|                                         | 30-49 Gy           | 30 (10%)                                   | 16 (12%)                                          | 46         |                            |
|                                         | 50+ Gy             | 97 (31%)                                   | 27 (21%)                                          | 124        |                            |
|                                         | Indirect           | 52 (17%)                                   | 18 (14%)                                          | 70         |                            |
|                                         | Unknown            | 21 (8%)                                    | 13 (10%)                                          | 82         |                            |

- Among those with complete medical records abstraction
