# Supplementary material
Source: PubMed Central journal article supplement (PMC4603599)
Supplement: supp_WNL.0000000000001951_Table_e-2.pdf [file supp_WNL.0000000000001951_Table_e-2.pdf]

Table e-2. Characteristics of 271 childhood cancer survivors with self-reported first-stroke on the 2011 stroke survey

| Characteristic                              | No. | (%)  |
|---------------------------------------------|-----|------|
| Vital status, alive                         | 214 | (79) |
| Male sex                                    | 140 | (52) |
| Race                                        |     |      |
| White, non-Hispanic                         | 217 | (80) |
| Black                                       | 16  | (6)  |
| Hispanic                                    | 1   | (0)  |
| Other/unknown                               | 37  | (14) |
| Age at cancer diagnosis, years              |     |      |
| 0-4                                         | 97  | (36) |
| 5-9                                         | 65  | (24) |
| 10-14                                       | 59  | (22) |
| 15-20                                       | 50  | (18) |
| Age at last followup (2011 survey) or death |     |      |
| <18                                         | 19  | (7)  |
| 18-29                                       | 37  | (14) |
| 30-39                                       | 94  | (35) |
| 40+                                         | 121 | (45) |
| Year of cancer diagnosis                    |     |      |

|                                |          |
|--------------------------------|----------|
| 1970-1973                      | 34 (13)  |
| 1974-1977                      | 62 (23)  |
| 1978-1981                      | 63 (23)  |
| 1982-1986                      | 112 (41) |
| Cancer diagnosis               |          |
| Brain tumor                    | 119 (44) |
| Leukemia                       | 77 (28)  |
| Hodgkins lymphoma              | 24 (9)   |
| Bone cancer                    | 14 (5)   |
| Kidney (Wilms)                 | 12 (4)   |
| Soft tissue sarcoma            | 12 (4)   |
| Non-Hodgkins lymphoma          | 7 (3)    |
| Neuroblastoma                  | 6 (2)    |
| Maximum cranial radiation dose |          |
| None                           | 45 (17)  |
| 1- <30 Gy                      | 48 (18)  |
| 30-49 Gy                       | 19 (7)   |
| 50+ Gy                         | 93 (34)  |
| Indirect                       | 38 (14)  |
| Unknown                        | 28 (10)  |
| Radiation to Neck              |          |
| Yes                            | 67 (25)  |
| No                             | 176 (65) |

|                                                    |          |
|----------------------------------------------------|----------|
| Unknown                                            | 28 (10)  |
| <b>Radiation to Neck or Brain</b>                  |          |
| Direct neck, no direct brain radiation             | 22 (8)   |
| Direct brain radiation (+/- neck radiation)        | 161 (59) |
| No neck or brain direct radiation                  | 60 (22)  |
| Unknown                                            | 28 (10)  |
| <b>Chest radiation</b>                             |          |
| Yes                                                | 72 (27)  |
| No                                                 | 170 (63) |
| Unknown                                            | 29 (11)  |
| <b>Chemotherapy</b>                                |          |
| Any methotrexate                                   | 95 (35)  |
| Any intrathecal methotrexate                       | 76 (28)  |
| Any intrathecal chemotherapy                       | 78 (29)  |
| Any alkylating agent                               | 142 (52) |
| Any anthracycline                                  | 88 (32)  |
| <b>High blood pressure (prior to first stroke)</b> |          |
| Yes                                                | 52 (19)  |
| No                                                 | 216 (80) |
| Unknown                                            | 3 (1)    |
| <b>Diabetes (prior to first stroke)</b>            |          |
| Yes                                                | 12 (4)   |
| No                                                 | 256 (94) |

|                                            |            |
|--------------------------------------------|------------|
| Unknown                                    | 3 (1)      |
| Ever smoked (prior to first stroke)        |            |
| Yes                                        | 34 (13)    |
| No                                         | 217 (80)   |
| Unknown                                    | 20 (7)     |
| Neurofibromatosis type 1                   |            |
| Yes                                        | 3 (1)      |
| No                                         | 196 (72)   |
| Unknown                                    | 72 (27)    |
| Age at first stroke, years, median (range) | 19 (0, 53) |
| Age at first stroke, years (categorical)   |            |
| <18                                        | 126 (46)   |
| 18-29                                      | 53 (20)    |
| 30-39                                      | 59 (22)    |
| 40+                                        | 30 (11)    |
| Type of first stroke                       |            |
| Ischemic                                   | 79 (29)    |
| Hemorrhagic                                | 65 (24)    |
| Not sure                                   | 83 (31)    |
| Missing                                    | 44 (16)    |
| First stroke symptoms lasted > 24 hours    |            |
| Yes                                        | 177 (65)   |
| No                                         | 53 (20)    |

|                                |     |      |
|--------------------------------|-----|------|
| Do not know                    | 41  | (15) |
| Characteristics of 1st stroke  |     |      |
| Unilateral weakness            | 174 | (64) |
| Difficulty walking             | 170 | (63) |
| Difficulty speaking            | 162 | (60) |
| Unilateral numbness            | 109 | (40) |
| Headache at the time of stroke | 90  | (33) |
| Visual changes                 | 90  | (33) |
| Seizure at the time of stroke  | 78  | (29) |
| Dizziness                      | 65  | (24) |
| Bilateral weakness             | 32  | (12) |
| No symptoms ("silent stroke")  | 18  | (7)  |
| Bilateral numbness             | 13  | (5)  |
| Brain imaging performed        |     |      |
| Both CT and MRI                | 94  | (35) |
| CT                             | 74  | (27) |
| MRI                            | 34  | (13) |
| No brain imaging done          | 23  | (8)  |
| Imaging not known              | 46  | (17) |
| Recovery from 1st stroke       |     |      |
| Complete                       | 100 | (37) |
| Partial                        | 137 | (51) |
| No recovery                    | 26  | (10) |

|                                                  |     |      |
|--------------------------------------------------|-----|------|
| Do not know                                      | 3   | (1)  |
| Told had abnormal blood vessels to the brain     |     |      |
| Yes                                              | 37  | (14) |
| No                                               | 162 | (60) |
| Do not know                                      | 72  | (27) |
| Told had moyamoya                                |     |      |
| Yes                                              | 12  | (4)  |
| No                                               | 202 | (75) |
| Do not know                                      | 57  | (21) |
| Told had narrowing of blood vessels to the brain |     |      |
| Yes                                              | 15  | (6)  |
| No                                               | 192 | (71) |
| Do not know                                      | 64  | (24) |
| Cavernous malformation                           | 3   | (1)  |
| Arteriovenous malformation                       | 3   | (1)  |
| Anti-thrombotic treatment after first stroke     | 104 | (38) |
